# Supplementary material for: Miniaturized Optimal Incident Light Angle-fitted Dark Field System for Contrast-enhanced Real-time Monitoring of 2D/3D-projected Cell Motions
Source: Research Square preprint supplement (doi:10.21203/rs.3.rs-1194147/v1), 2021-12-30
Supplement: Supplementary file 1 [file eecdfd94fc84b4857b984b2f.docx]

**Supplementary Information for**

**Miniaturized optimal incident light angle-fitted dark field system for contrast-enhanced real-time monitoring of 2D/3D-projected cell motions**

**Yeongseok Jang‡1, Seungbeom Han‡1, Chulgyu Song*2, Jinmu Jung*3, Jonghyun Oh*3**

1 Department of Mechanical Design Engineering, College of Engineering, Jeonbuk National University, Jeonju 54896, South Korea

2 Division of Electronic Engineering, College of Engineering, Jeonbuk National University, Jeonju 54896, South Korea

3 Department of Nano-bio Mechanical System Engineering, College of Engineering, Jeonbuk National University, Jeonju 54896, South Korea

*Corresponding authors: cgsong@jbnu.ac.kr (C. S), jmjung@jbnu.ac.kr (J. J) and jonghyuno@jbnu.ac.kr (J. O)

‡The authors contributed equally to this article.

**The PDF file includes:**

**Table:**

Table S1: Parts list of DFCMS

**Other Supplementary Materials for this manuscript includes the following:**

Movie S1 (.mp4 format). Short-term cell monitoring on 2D plane (3 days)

Movie S2 (.mp4 format). Long-term cell monitoring on 3D structure (10 days)

**Table:**

**Table S1.** Parts list of DFCMS

| **Component** | **Company** | **Details** | **Price ($)** |
| --- | --- | --- | --- |
| LED with heat sink | PHOTRON | 1W, 2.9~3.7V, White | 1.70 |
| Light diffuser | TONGYIFANG | SZH-LD446, 60 degree, PMMA material | 0.40 |
| Dark field filter | Formlabs | 3D printing, Form2 | 1.00 |
| Condenser lens | Edmond optics | #48-653, 30.0mm Dia. x 30.0mm FL, Uncoated, Plano-Convex Lens | 37.00 |
| Camera | Sony | IMX 214 CMOS sensor | 95.68 |
| Camera holder | Formlabs | 3D printing, Form2 | 1.00 |
| XYZ stage | TOHIGHER | LGD40-L | 99.90 |
| Potentiometer | Tocos | RV24YN-20S, 500 ohm | 1.80 |
| Aluminium frame |  | Matt black anodizing | 120.00 |
|  |  | **Total** | **358.48** |
